# Supplementary material
Source: PubMed Central journal article supplement (PMC7736526)
Supplement: NIHMS1643925-supplement-Supplemental_Publication_Material.pdf [file NIHMS1643925-supplement-Supplemental_Publication_Material.pdf]

## SUPPLEMENTAL MATERIAL

This appendix has been provided by the authors to give readers additional information about their work

### Supplement to: **Association between Immune Checkpoint Inhibitors with Cardiovascular Events and Atherosclerotic Plaque.**

Zsofia D. Drobni, MD<sup>1,2</sup>, Raza M. Alvi, MD<sup>1</sup>, Jana Taron, MD<sup>1</sup>, Amna Zafar, MD<sup>1</sup>, Sean P. Murphy, MD<sup>3</sup>, Paula K. Rambarat, MD<sup>3</sup>, Rayma C. Mosarla, MD<sup>3</sup>, Charlotte Lee, MD<sup>3</sup>, Daniel A. Zlotoff, MD, PhD<sup>4</sup>, Vineet K. Raghu, PhD<sup>1</sup>, Sarah E. Hartmann, BS<sup>1</sup>, Hannah K. Gilman, BS<sup>1</sup>, Jingyi Gong, MD<sup>1</sup>, Leyre Zubiri, MD, PhD<sup>5</sup>, Ryan J. Sullivan, MD<sup>5</sup>, Kerry L. Reynolds, MD<sup>5</sup>, Thomas Mayrhofer PhD<sup>1</sup>, Lili Zhang, MD, MS<sup>6</sup>, \*Udo Hoffmann, MD, MPH<sup>1</sup>, \*Tomas G. Neilan, MD, MPH<sup>1,4</sup>

\* Both senior authors contributed equally.

1, Cardiovascular Imaging Research Center (CIRC), Department of Radiology and Division of Cardiology, Massachusetts General Hospital, Harvard Medical School, Boston, MA, USA

2, Cardiovascular Imaging Research Group, Heart and Vascular Center, Semmelweis University, Budapest, Hungary

3, Division of Internal Medicine, Massachusetts General Hospital, Harvard Medical School, Boston, MA, USA

4, Division of Cardiology, Massachusetts General Hospital, Harvard Medical School, Boston, MA, USA

5, Division of Oncology and Hematology, Department of Medicine, Massachusetts General Hospital, Harvard Medical School, Boston, MA, USA

6, Cardio-Oncology Program, Division of Cardiology, Department of Medicine, Montefiore Medical Center, Albert Einstein College of Medicine, Bronx, NY, USA

| <b>Table of Contents:</b>                                                                                                                                                                                                                                                                                                                                                         | <b>Page</b> |
|-----------------------------------------------------------------------------------------------------------------------------------------------------------------------------------------------------------------------------------------------------------------------------------------------------------------------------------------------------------------------------------|-------------|
| <b>Supplemental Methods.....</b>                                                                                                                                                                                                                                                                                                                                                  | <b>3</b>    |
| • Document I: Key words used for each of the adjudicated clinical events and definitions used for each of the adjudicated clinical events.....                                                                                                                                                                                                                                    | 4-5         |
| • Document II: Computed tomography analysis methods.....                                                                                                                                                                                                                                                                                                                          | 6-7         |
| <b>Supplemental Tables.....</b>                                                                                                                                                                                                                                                                                                                                                   | <b>8</b>    |
| • Table I: Baseline laboratory variables of patients treated with immune checkpoint inhibitors and controls.....                                                                                                                                                                                                                                                                  | 9           |
| • Table II: Univariable Cox proportional hazard model results of the composite cardiovascular outcome (myocardial infarction, revascularization, ischemic stroke) .....                                                                                                                                                                                                           | 10-11       |
| • Table III: The number of patients with an event and number of events, the rate per 100-person years from our cohort of 2842 cases and the hazard ratio for cardiovascular events. Cardiovascular events for the one-year period pre-immune checkpoint inhibitor and one-year period post-immune checkpoint.....                                                                 | 12          |
| • Table IV: The number of patients with an event and number of events, the rate per 100-person years from our cohort of 2842 cases and the hazard ratio for cardiovascular events. The table is restricted to those who had events in the two-year period pre-and post-starting an immune checkpoint inhibitor after excluding patients who died within 60 days of the event..... | 13          |
| • Table V: Clinical characteristics of the subjects with melanoma included in the imaging study.....                                                                                                                                                                                                                                                                              | 14          |
| • Table VI: Comparison between baseline and follow up characteristics of patients in the imaging study.....                                                                                                                                                                                                                                                                       | 15          |
| • Table VII: Total and non-calcified plaque volume at each of the three imaging time points.....                                                                                                                                                                                                                                                                                  | 16          |
| <b>Supplemental Figures and Figure Legends.....</b>                                                                                                                                                                                                                                                                                                                               | <b>17</b>   |
| • Figure I: Schematic of the case-crossover study design.....                                                                                                                                                                                                                                                                                                                     | 18          |
| • Figure II: Schematic of the patient selection for the imaging.....                                                                                                                                                                                                                                                                                                              | 19          |
| • Figure III: Schematic of the timing of the imaging studies.....                                                                                                                                                                                                                                                                                                                 | 20          |
| • Figure IV: Forest plot of the hazard ratios for the composite cardiovascular outcome stratified by sub-groups within the matched cohort study.....                                                                                                                                                                                                                              | 21          |

## Supplemental Methods

**Document I/A. Key words used for each of the adjudicated clinical events**

For cardiovascular events, we did an individual chart review of each chart for any event of interest, at any time. These potential events were identified using a key word search. These key word searches included any of the following terms: myocardial infarction, MI, type 2 MI, type 1 MI, heart attack, ischemia, demand ischemia, positive troponin, ACS, acute coronary syndrome, PCI, percutaneous coronary intervention, angiogram, coronary angiogram, coronary, stent, CABG, coronary artery bypass surgery, coronary revascularization, revascularization, STEMI, NSTEMI, CVA, cerebrovascular accident, stroke, TIA, and transient ischemic attack. Data from the individual charts where a key word was found were then used to populate a CRF and all CRF's were then adjudicated using our standard definitions (below) by an investigator blinded to all other variables.

**Document I/B. Definitions used for each of the adjudicated clinical events**

Myocardial infarction (MI)

- The clinical presentation consistent with diagnosis of myocardial ischemia and infarction.
- Detection of a rise and/or fall of cardiac biomarker values (preferably cardiac troponin) with at least one value above the 99<sup>th</sup> percentile upper reference limit and with at least one of the following:
  - ♦ Symptoms of ischemia
  - ♦ New or presumed new significant ST-segment-T wave (ST-T) changes or new left bundle branch block (LBBB).
  - ♦ Development of pathological Q waves in the ECG.
  - ♦ Imaging evidence of new loss of viable myocardium or new regional wall motion abnormality.
  - ♦ Identification of an intracoronary thrombus by angiography.
- **ECG manifestations of acute myocardial ischemia (in absence of left ventricular hypertrophy (LVH) and left bundle branch block (LBBB)):**
  - ♦ **ST elevation**  
New ST elevation at the J point in two contiguous leads with the cut-points:  $\geq 0.1$  mV in all leads other than leads V2-V3 where the following cut-points apply:  $\geq 0.2$  mV in men  $\geq 40$  years ( $\geq 0.25$  mV in men  $< 40$  years) or  $\geq 0.15$  mV in women.
  - ♦ **ST depression and T-wave changes**  
New horizontal or down-sloping ST depression  $\geq 0.05$  mV in two contiguous leads and/or new T inversion  $\geq 0.1$  mV in two contiguous leads with prominent R wave or R/S ratio  $> 1$ .
- **ECG changes associated with prior myocardial infarction**
  - ♦ Pathological Q-waves, as defined above

|                                                                                                                                 |                                                                                                                                                                                                                                                                                                                                                                                                                                                                                                                                                                                                                                                                                                                                                                                                                                                |
|---------------------------------------------------------------------------------------------------------------------------------|------------------------------------------------------------------------------------------------------------------------------------------------------------------------------------------------------------------------------------------------------------------------------------------------------------------------------------------------------------------------------------------------------------------------------------------------------------------------------------------------------------------------------------------------------------------------------------------------------------------------------------------------------------------------------------------------------------------------------------------------------------------------------------------------------------------------------------------------|
|                                                                                                                                 | <ul style="list-style-type: none"> <li>♦ R-wave <math>\geq 0.04</math> seconds in V1-V2 and R/S <math>\geq 1</math> with a concordant positive T-wave in the absence of a conduction defect.</li> <li>• <b>Criteria for prior myocardial infarction</b><br/>Any one of the following criteria meets the diagnosis for prior MI: <ul style="list-style-type: none"> <li>♦ Pathological Q waves with or without symptoms in the absence of non-ischemic causes</li> <li>♦ Imaging evidence of a region of loss of viable myocardium that is thinned and fails to contract, in the absence of a non-ischemic cause.</li> <li>♦ Pathological findings of a prior myocardial infarction.</li> </ul> </li> </ul>                                                                                                                                     |
| <p>Coronary revascularization:</p> <ul style="list-style-type: none"> <li>• Percutaneous coronary intervention (PCI)</li> </ul> | <ul style="list-style-type: none"> <li>• Placement of an angioplasty guide wire, balloon, or other device (e.g., stent, atherectomy catheter, brachytherapy delivery device, or thrombectomy catheter) into a native coronary artery or coronary artery bypass graft for mechanical coronary revascularization.</li> </ul>                                                                                                                                                                                                                                                                                                                                                                                                                                                                                                                     |
| <ul style="list-style-type: none"> <li>• Coronary artery bypass graft surgery (CABG)</li> </ul>                                 | <ul style="list-style-type: none"> <li>• Surgical procedure to improve blood flow to the heart by using a healthy blood vessel (vein or artery) to bypass a blocked portion of one or more coronary arteries.</li> </ul>                                                                                                                                                                                                                                                                                                                                                                                                                                                                                                                                                                                                                       |
| Ischemic stroke                                                                                                                 | <ul style="list-style-type: none"> <li>• An acute episode of focal or global neurological dysfunction caused by brain, spinal cord, or retinal vascular injury because of infarction.</li> </ul> <p><b>Cerebral infarction</b> may be documented by the following:</p> <ul style="list-style-type: none"> <li>♦ brain imaging or,</li> <li>♦ persistence of symptoms beyond 24 hours or</li> <li>♦ death within 24 hours.</li> </ul> <p><b>Stroke classification:</b></p> <ul style="list-style-type: none"> <li>• <b>Ischemic stroke</b>—An acute episode of focal cerebral, spinal, or retinal dysfunction caused by infarction of central nervous system tissue. In case, the hemorrhage may be a consequence of ischemic stroke, the stroke is an ischemic stroke with hemorrhagic transformation and not a hemorrhagic stroke.</li> </ul> |

## **Document II. Computed tomography analysis methods.**

**Computed Tomography Image Acquisition:** We included all patients with melanoma with three evaluable serial contrast-enhanced thoracic computed tomography scans, at > three months before immune checkpoint inhibitor (scan 0),  $\leq$  three month prior to starting immune checkpoint inhibitor (scan 1), and the most recent available (scan 2). Computed tomography images were acquired per standard departmental protocol for cancer screening. All scans had excellent image quality. Corrupted or incomplete datasets as well as scans with slice thickness > three mm were excluded from the analysis.

**Computed Tomography Image Analysis:** Aortic plaque measurements were performed on contrast-enhanced chest computed tomography in the descending thoracic aorta. The ascending aorta as well as the aortic arch were spared due to motion artifacts on non-gated images. Image analysis was performed using a dedicated and validated analysis software (QAngio CT, version 3.1.4.2, Medis Medical Imaging Systems, Leiden, the Netherlands) by a radiologist with 7 years of experience in computed tomography. All analyses were performed blinded to date of study, date of start of immune checkpoint inhibitor and all other study variables. Aortic segments for evaluation were established manually. Segment length and level were kept identical for all three time points to minimize variability. Segmentation of inner and outer vessel boundaries was performed in a semi-automated fashion with manual adjustments. Plaque volume was calculated automatically (defined as vessel volume – lumen volume). Voxels with an attenuation of  $\geq 130$  Hounsfield Units (HU) were assigned to the calcified plaque volume portion. Plaque volumes with attenuation less than 130 HU was considered non-calcified plaque. This volumetric plaque assessment technique has demonstrated excellent intra- and inter-observer, as well as interscan reproducibility (Ref 20-22). Relative plaque volume measures were assessed as percent of total segment volume. Plaque change was calculated as the difference in plaque volume measured on

two consecutive scans (i.e., scan 2 – scan 1 and scan 1 – scan 0). Annualized plaque progression rate was computed as plaque change per year given in absolute and relative rates ( $\text{mm}^3$  and %).

## Supplemental Tables



**Table I. Baseline laboratory variables of patients treated with immune checkpoint inhibitors and controls.**

|                                                         |                                   | <b>Cases<br/>(n=2842)</b> |        | <b>Controls<br/>(n=2842)</b>      |       |        | <b>P<br/>Value</b> |
|---------------------------------------------------------|-----------------------------------|---------------------------|--------|-----------------------------------|-------|--------|--------------------|
| <b>Baseline laboratory parameters – mean. (SD)</b>      |                                   |                           |        |                                   |       |        |                    |
|                                                         | <i>Data<br/>available<br/>(n)</i> |                           |        | <i>Data<br/>available<br/>(n)</i> |       |        |                    |
| Hemoglobin (g/dL)                                       | 2599                              | 11.9                      | (2.0)  | 2687                              | 13.1  | (1.7)  | <0.001             |
| White blood count (Thousand/uL)                         | 2599                              | 8.1                       | (9.0)  | 2659                              | 7.4   | (4.5)  | 0.001              |
| Glomerular filtration rate (mL/min/1.73m <sup>2</sup> ) | 1035                              | 68.2                      | (23.9) | 422                               | 72.2  | (30.4) | 0.008              |
| Total cholesterol (mg/dL)                               | 896                               | 176.2                     | (46.5) | 1568                              | 180.7 | (45.7) | 0.021              |
| Low density lipoprotein (mg/dL)                         | 784                               | 100.0                     | (36.9) | 1183                              | 100.0 | (34.4) | 0.96               |
| High density lipoprotein (mg/dL)                        | 810                               | 50.0                      | (20.0) | 1448                              | 52.2  | (17.9) | 0.006              |

**Table II. Univariable Cox proportional hazard model results of the composite cardiovascular outcome (myocardial infarction, revascularization, ischemic stroke)**

|                                                                            | <b>Hazard Ratio</b> | <b>95 % Confidence Interval</b> |      | <b>Wald test P Value</b> |
|----------------------------------------------------------------------------|---------------------|---------------------------------|------|--------------------------|
| <b>Demographic variables</b>                                               |                     |                                 |      |                          |
| Male sex                                                                   | 1.41                | 1.12                            | 1.77 | 0.003                    |
| Age                                                                        | 1.04                | 1.03                            | 1.05 | <0.001                   |
| Body mass index                                                            | 1.01                | 0.99                            | 1.03 | 0.55                     |
| Systolic blood pressure                                                    | 1.02                | 1.01                            | 1.02 | <0.001                   |
| <b>Cardiovascular risk factors</b>                                         |                     |                                 |      |                          |
| Hypertension                                                               | 1.81                | 1.43                            | 2.29 | <0.001                   |
| Diabetes mellitus                                                          | 1.75                | 1.35                            | 2.27 | <0.001                   |
| Smoking current or prior                                                   | 1.29                | 0.94                            | 1.77 | 0.11                     |
| Hyperlipidemia                                                             | 1.59                | 1.27                            | 2.00 | <0.001                   |
| History of any cardiovascular event                                        | 3.07                | 2.38                            | 3.97 | <0.001                   |
| Chronic kidney disease                                                     | 1.48                | 1.08                            | 2.04 | 0.016                    |
| <b>Medications and prior potentially cardiotoxic therapies</b>             |                     |                                 |      |                          |
| Angiotensin converting enzyme inhibitor or angiotensin II receptor blocker | 1.63                | 1.27                            | 2.08 | <0.001                   |
| Aspirin                                                                    | 2.06                | 1.62                            | 2.62 | <0.001                   |
| Statin therapy                                                             | 1.61                | 1.26                            | 2.05 | <0.001                   |
| Prior radiation therapy                                                    | 1.73                | 1.29                            | 2.32 | <0.001                   |
| Fluorouracil                                                               | 1.22                | 0.80                            | 1.86 | 0.37                     |
| Anthracyclines                                                             | 0.51                | 0.27                            | 0.96 | 0.038                    |
| Immune checkpoint inhibitors                                               | 4.68                | 3.52                            | 6.23 | <0.001                   |
| <b>Immune checkpoint inhibitor type</b>                                    |                     |                                 |      |                          |
| <i>Monotherapy</i>                                                         |                     |                                 |      |                          |
| Programmed death-ligand-1                                                  | 1.25                | 0.83                            | 1.89 | 0.29                     |
| Cytotoxic-T-Lymphocyte associated protein 4                                | 0.77                | 0.42                            | 1.39 | 0.38                     |
| Programmed death-protein 1                                                 | 1.25                | 0.83                            | 1.89 | 0.29                     |
| <i>Combination Therapy</i>                                                 |                     |                                 |      |                          |
| Cytotoxic-T-Lymphocyte associated protein 4/Programmed death protein 1     | 0.77                | 0.42                            | 1.39 | 0.38                     |
| <b>Cancer types</b>                                                        |                     |                                 |      |                          |
| Non-small cell lung cancer                                                 | 1.66                | 1.31                            | 2.11 | <0.001                   |
| Melanoma                                                                   | 0.80                | 0.62                            | 1.03 | 0.08                     |
| Head and neck cancer                                                       | 0.88                | 0.63                            | 1.25 | 0.48                     |
| Renal and genitourinary cancer                                             | 0.94                | 0.60                            | 1.49 | 0.80                     |
| Breast cancer                                                              | 0.49                | 0.24                            | 0.98 | 0.044                    |
| Gastrointestinal cancer                                                    | 0.92                | 0.54                            | 1.57 | 0.76                     |
| Gynecologic cancer                                                         | 0.99                | 0.58                            | 1.70 | 0.98                     |

**Table II. Continue. Univariable Cox proportional hazard model results of the composite cardiovascular outcome (myocardial infarction, revascularization, ischemic stroke)**

|                      |      |      |      |      |
|----------------------|------|------|------|------|
| Lymphoma             | 0.77 | 0.39 | 1.49 | 0.43 |
| Hepatobiliary cancer | 0.47 | 0.18 | 1.26 | 0.13 |
| Pancreatic cancer    | 1.39 | 0.52 | 3.72 | 0.52 |
| Other type of cancer | 1.24 | 0.79 | 1.95 | 0.35 |

**Table III. The number of patients with an event and number of events, the rate per 100-person years from our cohort of 2842 cases and the hazard ratio for cardiovascular events. Cardiovascular events are compared for the one-year period pre-immune checkpoint inhibitor and one-year period post-immune checkpoint.**

| End-point, n (%)           | Pre-treatment                |                        | Post-treatment               |                        | Hazard Ratio*<br>(95% CI) | P Value |
|----------------------------|------------------------------|------------------------|------------------------------|------------------------|---------------------------|---------|
|                            | No. of patients with event % | Rate per 100 person-yr | No. of patients with event % | Rate per 100 person-yr |                           |         |
| Cardiovascular events      | 43 (1.51%)                   | 1.52                   | 83 (2.92%)                   | 5.55                   | 3.59 (2.47-5.21)          | <0.001  |
| End-point, n (%)           | No. of events. %             | Rate per 100 person-yr | No. of event. %              | Rate per 100 person-yr |                           |         |
| Myocardial infarction      | 16 (0.56%)                   | 0.58                   | 37 (1.30%)                   | 2.38                   | 3.01 (1.21-6.27)          | <0.001  |
| Coronary revascularization | 13 (0.46%)                   | 0.46                   | 22 (0.77%)                   | 1.41                   | 2.48 (1.07-5.34)          | <0.001  |
| Ischemic stroke            | 21 (0.74%)                   | 0.74                   | 35 (1.23%)                   | 2.25                   | 2.20 (1.15-4.42)          | <0.001  |

\* Cox proportional hazard model

**Table IV. The number of patients with an event and number of events, the rate per 100-person years from our cohort of 2842 cases and the hazard ratio for cardiovascular events. The table is restricted to those who had events in the two-year period pre-and post-starting an ICI after excluding patients who died within 60 days of the event.**

| End-point, n (%)           | Pre-treatment                 |                        | Post-treatment                |                        | Hazard Ratio*<br>(95% CI) | P Value |
|----------------------------|-------------------------------|------------------------|-------------------------------|------------------------|---------------------------|---------|
|                            | No. of patients with events % | Rate per 100 person-yr | No. of patients with events % | Rate per 100 person-yr |                           |         |
| Cardiovascular events      | 66 (2.34%)                    | 1.18                   | 102 (3.61%)                   | 4.74                   | 4.15 (3.01-5.73)          | <0.001  |
| End-point, n (%)           | No. of events. %              | Rate per 100 person-yr | No. of events. %              | Rate per 100 person-yr |                           |         |
| Myocardial infarction      | 27 (0.95%)                    | 0.48                   | 51 (1.80%)                    | 2.41                   | 4.24 (2.46-7.71)          | <0.001  |
| Coronary revascularization | 25 (0.88%)                    | 0.44                   | 33 (1.17%)                    | 1.56                   | 2.89 (1.26-5.89)          | <0.001  |
| Ischemic stroke            | 26 (0.92%)                    | 0.46                   | 36 (1.27%)                    | 1.70                   | 1.73 (1.31-5.37)          | <0.001  |

\* Cox proportional hazard model

**Table V. Clinical characteristics of the subjects with melanoma included in the computed tomography study.**

| Characteristics                                               | N=40            |
|---------------------------------------------------------------|-----------------|
| <b>Demographic</b>                                            |                 |
| Age– yr. mean. (SD)                                           | 67±11           |
| Male - %                                                      | 55%             |
| <b>Race or ethnic group – no. (%)</b>                         |                 |
| White race                                                    | 100%            |
| Non-Hispanic ethnicity                                        | 84.6%           |
| <b>Immune checkpoint inhibitor – %</b>                        |                 |
| Immune checkpoint inhibitor monotherapy                       | 87.5%           |
| Immune checkpoint inhibitor combination therapy               | 12.5%           |
| Number of cycles, no. (IQR)                                   | 8.5 (4.5, 23.5) |
| <b>Presence of immune related adverse event of any degree</b> |                 |
| Immune related adverse event grade 1-2                        | 17.5%           |
| Immune related adverse event grade 3-4                        | 27.5%           |
| <b>Corticosteroid therapy</b>                                 | 57.5%           |

**Table VI. Comparison between baseline and follow-up characteristics of the patients with melanoma included in the computed tomography study.**

| <b>Characteristics</b>                       | <b>At scan 0</b> | <b>At scan 1</b> |
|----------------------------------------------|------------------|------------------|
| <b>Cardiovascular risk factors – no. (%)</b> |                  |                  |
| Hypertension                                 | 47.5%            | 52.5%            |
| Diabetes                                     | 7.5%             | 10.0%            |
| Never smoker                                 | 52.5%            | 55.0%            |
| <b>Systolic blood pressure, mmHg. (SD)</b>   | <b>133±17.1</b>  | <b>135±17.1</b>  |
| <b>Cardiovascular diagnoses – no. (%)</b>    |                  |                  |
| History of myocardial infarction             | 7.5%             | 10.0%            |
| History of coronary revascularization        | 10.0%            | 12.5%            |
| History of ischemic stroke                   | 0                | 0                |
| <b>Cardiovascular medications – no (%)</b>   |                  |                  |
| Aspirin                                      | 17.5%            | 27.5%            |
| Statin                                       | 42.5%            | 42.5%            |

**Table VII. Total and non-calcified plaque volume at each of the three imaging time-points.**

|                                     | N=40                                         | Scan 0           | Scan 1           | Scan 2           |
|-------------------------------------|----------------------------------------------|------------------|------------------|------------------|
| <b>Median (IQR), mm<sup>3</sup></b> | Plaque volume, mm <sup>3</sup>               | 1438 (703, 2690) | 1567 (703, 2676) | 2183 (923, 4150) |
|                                     | Non-calcified plaque volume, mm <sup>3</sup> | 1285 (643, 2193) | 1130 (592, 1986) | 1725 (733, 3584) |



## Supplemental Figures and Figure Legends

**Figure I. Schematic of the case-crossover study design.** Patient A represents a person who starts an immune checkpoint inhibitor and is hospitalized for an acute vascular event during the 2-year control interval (light-shaded areas) prior to exposure. Patient B represents a person who starts an immune checkpoint inhibitor and who has an atherosclerotic event during the risk interval, within 2-years after starting an immune checkpoint inhibitor (dark-shaded areas). The case-crossover study assessed the relative incidence of cardiovascular events during the risk interval as compared with the control interval. Note that the figure is not to scale.

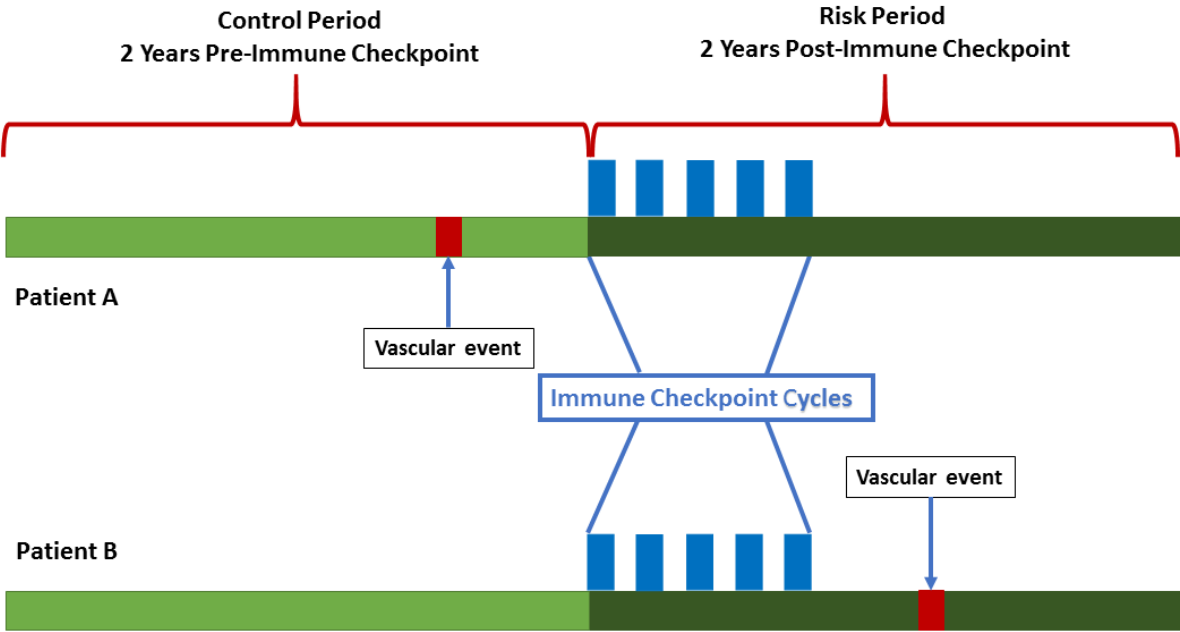

**Figure II. Schematic of the patient selection for the imaging.** We analyzed all patients with melanoma treated with an immune checkpoint inhibitor with the following inclusion criteria: 1. They had undergone three thoracic contrast-enhanced computed tomography studies as part of their routine clinical care for cancer staging. 2. The first computed tomography was  $>3$  months prior to the immune checkpoint inhibitor initiation, the second  $\leq 3$  months prior to starting, and a third at least one year after starting an immune checkpoint inhibitor (Figure III in the Supplement), 3. Subjects had atherosclerosis on the first computed tomography study, and 4. Images were of adequate quality for quantification of plaque. The final sample size meeting all the inclusion criteria was 40 subjects. The study population was enriched by the inclusion of only patients with atherosclerotic plaque on the baseline study. When more than one study was available for the baseline study, the oldest study was analyzed. When more than one study was available for the follow-up study then the most recent study was analyzed.

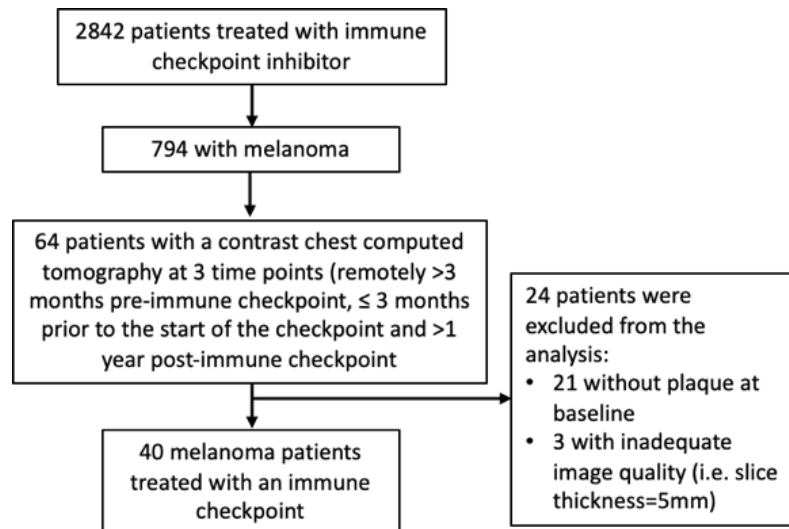

**Figure III. Schematic of the timing of the imaging studies.** The interval from the first thoracic computed tomography study to the pre-immune checkpoint inhibitor study was a median of 490 days (range 149 - 1325 days) and the interval from the pre-immune checkpoint inhibitor study to the post-immune checkpoint inhibitor study was 1171 days (range 519 - 1486 days). The median interval from the pre-immune checkpoint inhibitor imaging study to the start of immune checkpoint inhibitor was 16.5 days (range 10.5 - 31.5). A subject may have had more than one computed tomography study in the period from the first study to the pre-immune checkpoint inhibitor study. If so, the oldest study was chosen. Similarly, a subject may have had several imaging studies after starting an immune checkpoint inhibitor. If so, the most recent computed tomography study was chosen. The total plaque volume was quantified at each time-point chosen and then adjusted for the varying time intervals between the scans to create an annualized rate of plaque volume change. The yearly change in plaque volume from between the two intervals (pre-immune checkpoint inhibitor to post-immune checkpoint inhibitor) was compared. Additional measures of interest included the non-calcified plaque volume.

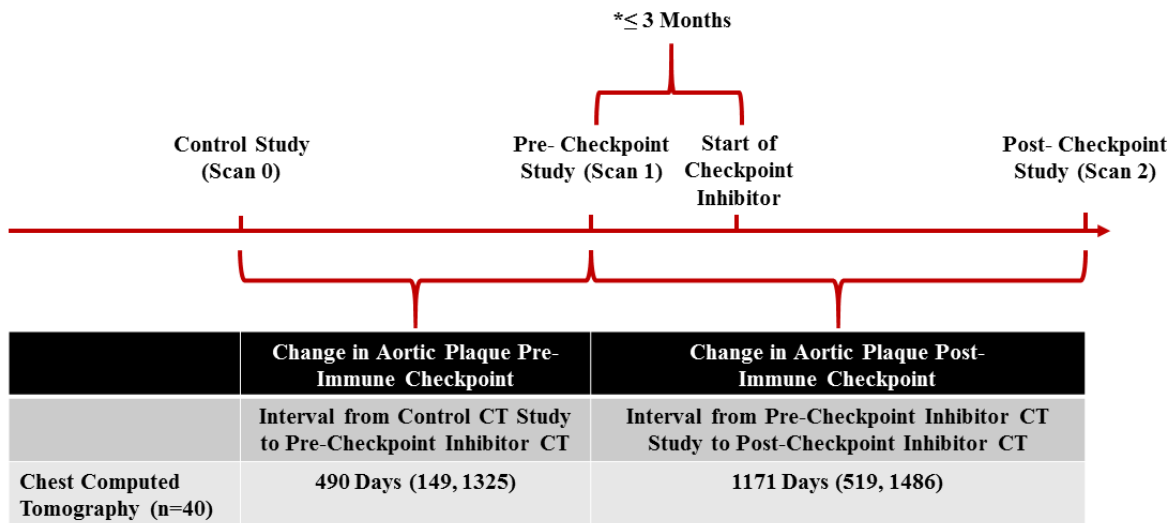

\*Median interval from scan 1 to start of checkpoint inhibitor was 16.5 days (Interquartile range, 10.5 - 31.5)

**Figure IV. Forest plot of the hazard ratios for the composite cardiovascular outcome stratified by sub-groups within the matched cohort study.** We report the *P* value for the interaction term from the Cox proportional model and the *P* value from the heterogeneity chi-squared test. Significant interaction was observed in body mass index, hypertension and statin use and immune checkpoint inhibitor therapy. However, the hazard ratios for each subgroup only differed in subgroup analysis for hypertension.

**Subgroup analysis**

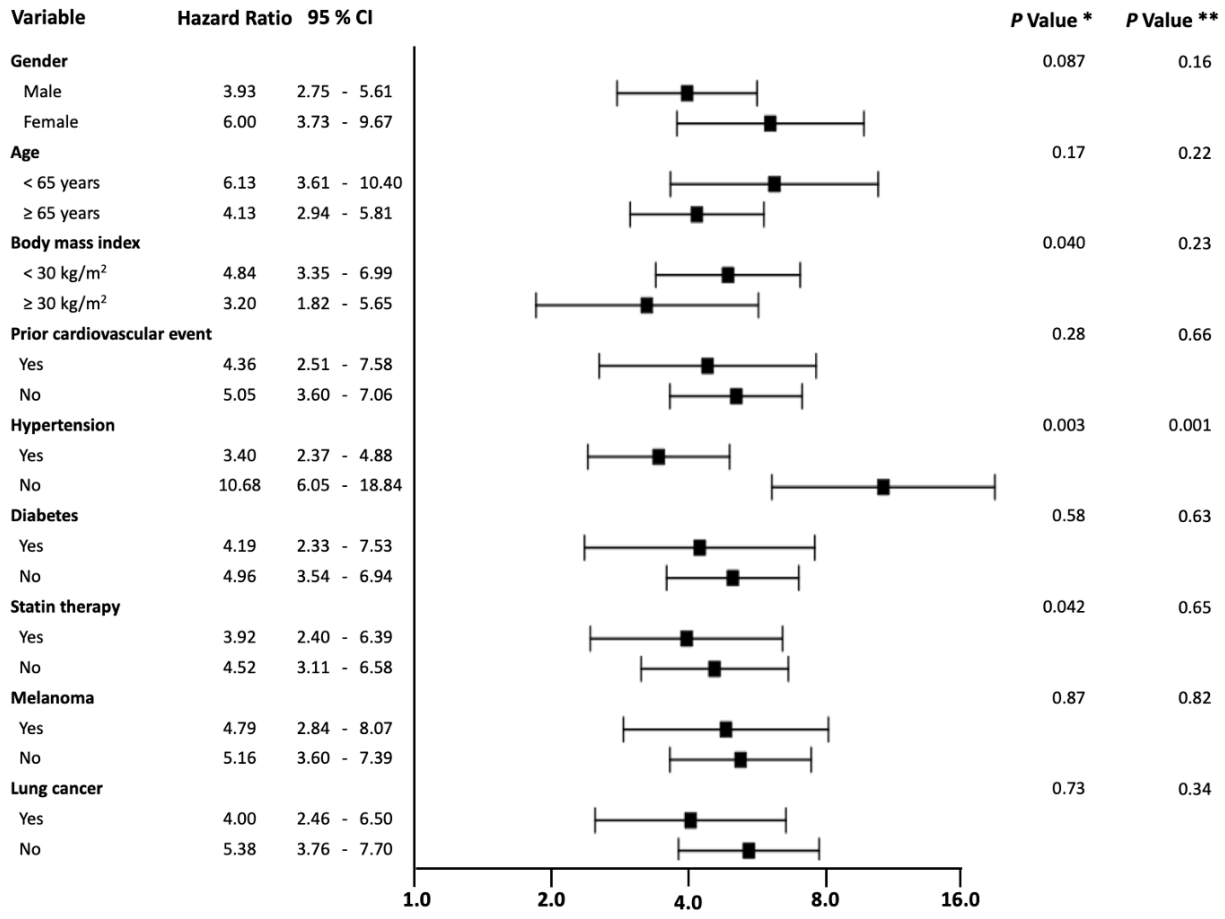

\*: *P* Value for the interaction term

\*\*: *P* Value for the heterogeneity chi-squared test
